# Supplementary material for: Mind the intention-behavior gap: a qualitative study of post-myocardial infarction patients’ beliefs and experiences with long-term supervised and self-monitored physical exercise
Source: PubMed Central journal article supplement (PMC11437989; doi:10.1186/s13102-024-00987-2), 2024-09-27
Supplement: 13102_2024_987_MOESM1_ESM.pdf [file 13102_2024_987_MOESM1_ESM.pdf]

|                                                                                                                                                                                                                                                                                                                                                                                                                                                                           |                                                                                                                                                                                                                                                                                                                                 |
|---------------------------------------------------------------------------------------------------------------------------------------------------------------------------------------------------------------------------------------------------------------------------------------------------------------------------------------------------------------------------------------------------------------------------------------------------------------------------|---------------------------------------------------------------------------------------------------------------------------------------------------------------------------------------------------------------------------------------------------------------------------------------------------------------------------------|
| <p><b>Introduction:</b> Before the interview and audio recording begins, the information in the information sheet is repeated, and the informant is assured of voluntariness, anonymization, and confidentiality.</p> <p><b>Informants:</b> Participants in NorEx (region: Trøndelag)</p> <p><b>Objective:</b> Obtain information about the experience of changing and maintaining physical activity level through participation in NorEx (12 months after starting).</p> |                                                                                                                                                                                                                                                                                                                                 |
| <p><b>Interview:</b></p>                                                                                                                                                                                                                                                                                                                                                                                                                                                  |                                                                                                                                                                                                                                                                                                                                 |
| <p><i>Information about the purpose of the interview:</i></p>                                                                                                                                                                                                                                                                                                                                                                                                             | <p>Participant's experience of participating in NorEx - with a focus on factors that promote or inhibit changes in physical activity levels and exercise.</p>                                                                                                                                                                   |
| <p><i>Information about the interview situation:</i></p>                                                                                                                                                                                                                                                                                                                                                                                                                  | <p><u>Repeat information from the information sheet:</u><br/>Voluntariness/Consent, confidentiality, anonymization of data, communication, publication, audio recording, possible to withdraw at any time, the opportunity to not answer questions if desired.</p> <p>Provide a summary of the topic areas we will address.</p> |
| <p><b>Questions</b></p>                                                                                                                                                                                                                                                                                                                                                                                                                                                   | <p><b>Follow-up questions</b></p>                                                                                                                                                                                                                                                                                               |
| <p><b>Part 1:<br/>Practical information and physical activity background</b></p>                                                                                                                                                                                                                                                                                                                                                                                          |                                                                                                                                                                                                                                                                                                                                 |
| <p>1 Tell me about yourself:</p> <ul style="list-style-type: none"> <li>• Age</li> <li>• Gender</li> <li>• Marital status</li> <li>• Occupational status</li> </ul>                                                                                                                                                                                                                                                                                                       |                                                                                                                                                                                                                                                                                                                                 |
| <p>2 What was your activity level like and your relationship to physical activity when you were younger?</p>                                                                                                                                                                                                                                                                                                                                                              | <ul style="list-style-type: none"> <li>• Was your family active? <i>(to get an idea of activity level)</i></li> <li>• What impact do you think this has had on how you have experienced physical activity/exercise later in life?</li> </ul>                                                                                    |
| <p>3 Have you previously tried to change your exercise habits? <i>(Before joining NorEx)</i></p>                                                                                                                                                                                                                                                                                                                                                                          | <ul style="list-style-type: none"> <li>• How did it go?</li> <li>• What made you succeed?</li> <li>• <i>Alternatively:</i> What caused you to revert to old habits?</li> <li>• <i>Alternatively:</i> What experiences did you gain back then that you brought into your NorEx participation?</li> </ul>                         |

|                                                                        |                                                                                                         |                                                                                                                                                                                                                                                                                                                                                                                                                                                                                                                       |
|------------------------------------------------------------------------|---------------------------------------------------------------------------------------------------------|-----------------------------------------------------------------------------------------------------------------------------------------------------------------------------------------------------------------------------------------------------------------------------------------------------------------------------------------------------------------------------------------------------------------------------------------------------------------------------------------------------------------------|
| 4                                                                      | How did experiencing a myocardial infarction affect your physical activity pattern?                     | <ul style="list-style-type: none"> <li>• <i>If changed as a result of the event:</i> What has enabled you to achieve this?</li> <li>• <i>If not changed but changed intention:</i> What could be the reasons for not actually increasing physical activity/exercise?</li> <li>• <i>If neither intention nor change made:</i> What could be the reasons for this?</li> <li>• Is it different now than it was then? Has this changed over time, from when you first had the myocardial infarction until now?</li> </ul> |
| <p><b>Part 2:<br/>Discovering NorEx and the introductory phase</b></p> |                                                                                                         |                                                                                                                                                                                                                                                                                                                                                                                                                                                                                                                       |
| <p>About background and expectations for participation in NorEx</p>    |                                                                                                         |                                                                                                                                                                                                                                                                                                                                                                                                                                                                                                                       |
| 6                                                                      | When you heard about NorEx, what was the main reason you wanted to participate?                         | <ul style="list-style-type: none"> <li>• Can you tell a little more about that? (<i>to get an idea if they had to consider it or not, why?</i>)</li> <li>• Did you decide to participate on your own? Or were you recommended to join?</li> </ul>                                                                                                                                                                                                                                                                     |
| 7                                                                      | What expectations did you have to participating in NorEx?                                               | <ul style="list-style-type: none"> <li>• In what ways has NorEx met/not met your expectations?</li> </ul>                                                                                                                                                                                                                                                                                                                                                                                                             |
| <p><b>About the introductory phase</b></p>                             |                                                                                                         |                                                                                                                                                                                                                                                                                                                                                                                                                                                                                                                       |
| 8                                                                      | Can you tell me about your experiences with the introductory phase of NorEx?                            | <ul style="list-style-type: none"> <li>• What did you learn in the initial phase?</li> <li>• How much did you feel you were able to influence your own exercise plan?</li> <li>• How long did it take before you felt you were really getting started with the exercise/change? Why do you think it turned out that way?</li> </ul>                                                                                                                                                                                   |
| 9                                                                      | Have you had a specific action plan for your exercise?                                                  | <ul style="list-style-type: none"> <li>• <i>If made a plan:</i> How has this worked for you?</li> <li>• <i>If no plan:</i> How has this worked for you (conscious choice?) (<i>Reasons why it worked/didn't work</i>)</li> </ul>                                                                                                                                                                                                                                                                                      |
| <p><b>Part 3:<br/>Status and plans for adherence</b></p>               |                                                                                                         |                                                                                                                                                                                                                                                                                                                                                                                                                                                                                                                       |
| 10                                                                     | Now that you've been participating in NorEx for a while, how has it generally been going with exercise? | <ul style="list-style-type: none"> <li>• What are the reasons you succeed?</li> <li><i>Alternatively:</i></li> <li>• What are the reasons you don't succeed?</li> <li>• Are you satisfied with your physical activity level?</li> <li>• Would you like something to be different in this regard?</li> <li>• To what extent do you experience joy with the exercise you do?</li> </ul>                                                                                                                                 |

|                                                                    |                                                                                                                                                   |                                                                                                                                                                                                                                                                                                                                                     |
|--------------------------------------------------------------------|---------------------------------------------------------------------------------------------------------------------------------------------------|-----------------------------------------------------------------------------------------------------------------------------------------------------------------------------------------------------------------------------------------------------------------------------------------------------------------------------------------------------|
| 11                                                                 | During this period, have you had any short or longer breaks from the change (exercise) you have done in connection with NorEx participation?      | <ul style="list-style-type: none"> <li>• What was the reason?</li> <li>• What did you do then?</li> <li>• How did you manage it?/what do you think is the reason it was difficult?</li> <li>• <i>Given that you have changed exercise habits with NorEx: Do you have a plan for what to do if you were to fall back into old habits?</i></li> </ul> |
| 12                                                                 | How is it going with making room for exercise in your everyday life after you started with NorEx?                                                 | <ul style="list-style-type: none"> <li>• Why do you think you succeed/don't succeed?</li> </ul>                                                                                                                                                                                                                                                     |
| 13                                                                 | To what extent do you feel you have personal control over your exercise routine?                                                                  | <ul style="list-style-type: none"> <li>• Why do you think it's like that?</li> <li>• Do you ever feel guilty, for example, for not exercising?</li> <li>• What happens if you feel you don't want to exercise? (strategies to start exercising again?)</li> </ul>                                                                                   |
| <b>Part 4:<br/>Exploring barriers, facilitators and motivators</b> |                                                                                                                                                   |                                                                                                                                                                                                                                                                                                                                                     |
| 14                                                                 | Some might feel anxious during exercise. How is that in your case?                                                                                | <ul style="list-style-type: none"> <li>• <i>If anxiety:</i> What needs do you have in that regard? Could NorEx have helped with that?</li> <li>• <i>If no anxiety:</i> Reflect, good to hear that you feel safe in exercise situations.</li> </ul>                                                                                                  |
| 15                                                                 | Some people feel prevented from exercising by physical pains, or concern about getting pains in the body from exercising. How is it for you?      | <ul style="list-style-type: none"> <li>• Why do you think it's like that? (<i>that you don't have problems with this or that you have problems with it</i>)</li> </ul>                                                                                                                                                                              |
| 16                                                                 | Some people feel that the effects of the medications they use prevent them from exercising. How is it for you?                                    | <ul style="list-style-type: none"> <li>• <i>If problems:</i> What have you done to get help/advice on this?</li> </ul>                                                                                                                                                                                                                              |
| 17                                                                 | Some people feel they need more knowledge about exercise and their body to be able to continue with the changes you have made. How is it for you? | <ul style="list-style-type: none"> <li>• Why do you think it's like that for you?</li> </ul>                                                                                                                                                                                                                                                        |
| 18                                                                 | Some people feel they need to be sure they can handle the exercise they are going to do before they get started - How is it for you?              |                                                                                                                                                                                                                                                                                                                                                     |

|                                       |                                                                                                                                                           |                                                                                                                                                                                                                                                                                                        |
|---------------------------------------|-----------------------------------------------------------------------------------------------------------------------------------------------------------|--------------------------------------------------------------------------------------------------------------------------------------------------------------------------------------------------------------------------------------------------------------------------------------------------------|
| 19                                    | Have you chosen to have an exercise buddy with you, and how does that work?                                                                               | <ul style="list-style-type: none"> <li>• What do you think is the reason it works well/not so well?</li> <li>• How important is it for you to exercise with someone?</li> </ul>                                                                                                                        |
| 20                                    | How do you experience that friends and family support your exercise?                                                                                      | <ul style="list-style-type: none"> <li>• Can you give examples?</li> <li>• Have there been others who have contributed to you succeeding/not succeeding in changing your activity level?</li> </ul>                                                                                                    |
| 21                                    | How do you feel that your physical surroundings (your local area) are adapted for you to exercise and be physically active?                               | <ul style="list-style-type: none"> <li>• Why do you think it's like that? What could be changed so that you were more likely to succeed/what is important for you to succeed?</li> <li>• What opportunities do you have around you to do be as physically active as you have planned to be?</li> </ul> |
| 22                                    | As a part of NorEx you have the opportunity to use an app and a watch as support for exercise. How has it been using these?                               | <ul style="list-style-type: none"> <li>• Why do you think it's like that for you?</li> <li>• What makes you succeed/not succeed?</li> <li>• How could things have been done differently to make it even better for you?</li> </ul>                                                                     |
| 23                                    | How does the PAI point system work for you?                                                                                                               |                                                                                                                                                                                                                                                                                                        |
| <b>Experiences with NorEx trainer</b> |                                                                                                                                                           |                                                                                                                                                                                                                                                                                                        |
| 24                                    | What has your coach meant to you during the period you have participated in NorEx?                                                                        | <ul style="list-style-type: none"> <li>• Why do you think it's like that? - reasons for good/not so good?</li> <li>• What do you think the NorEx coach could have done differently?</li> </ul>                                                                                                         |
| 25                                    | How do you experience your relationship with your NorEx coach?                                                                                            |                                                                                                                                                                                                                                                                                                        |
| 26                                    | Are there any other things you can think of - that we haven't talked about so far – that prevent you or make it difficult to change your exercise habits? |                                                                                                                                                                                                                                                                                                        |
| 27                                    | Are there any other things you can think of - that we haven't talked about so far - that help you change your exercise habits?                            |                                                                                                                                                                                                                                                                                                        |

| <b>Part 5:<br/>Exercise beliefs and self-efficacy</b> |                                                                                                                                                                                                                                                                                                                               |                                                                                                                                                                                                                                                         |
|-------------------------------------------------------|-------------------------------------------------------------------------------------------------------------------------------------------------------------------------------------------------------------------------------------------------------------------------------------------------------------------------------|---------------------------------------------------------------------------------------------------------------------------------------------------------------------------------------------------------------------------------------------------------|
| 28                                                    | <i>If made changes:</i> How do the changes make you feel?/How have the changes you have made affected what you do in your everyday life?                                                                                                                                                                                      | <ul style="list-style-type: none"> <li>• Are you more active and participate more, for example? Do you have more energy/feel that you can endure more?</li> </ul>                                                                                       |
| 29                                                    | <p><i>If made changes and experienced progress:</i> What do you think is the reason for that?</p> <p><i>If no experience of progress:</i> How do you think you can achieve a sense of progress?</p>                                                                                                                           |                                                                                                                                                                                                                                                         |
| 30                                                    | <i>If made changes:</i> How long do you think you will continue with the exercise you are doing now? <i>If no changes made:</i> To what extent do you think it is possible for you to make a lasting change in your physical activity level in the future?                                                                    | <ul style="list-style-type: none"> <li>• What is your plan going forward?</li> <li>• <i>If you have an action plan:</i> What is your action plan for the next two-three months?</li> <li>• Reasons why you think it's realistic/unrealistic?</li> </ul> |
| 31                                                    | <p><i>If made changes:</i> How realistic is it that you'll be able to continue with the amount of exercise you're currently doing, for the next month? What about the rest of the study-period?</p> <p><i>If no changes made:</i> How realistic do you think it is that you will start exercising in the next few months?</p> |                                                                                                                                                                                                                                                         |
| 32                                                    | <i>If made changes:</i> To what extent would you say that exercise has become a habit?                                                                                                                                                                                                                                        | <ul style="list-style-type: none"> <li>• <i>If a habit:</i> what do you think you have done to make it work?</li> <li>• <i>If not a habit:</i> What do you think is the reason for that?</li> </ul>                                                     |
| 33                                                    | Thinking about the time you've been part of NorEx; in what way have your beliefs towards physical activity changed?                                                                                                                                                                                                           | <ul style="list-style-type: none"> <li>• What do you think is the reason for that?</li> </ul>                                                                                                                                                           |

| <b>Part 6: Summary and conclusion</b>                                                                                                                                                                                                                                                                                                                                                                                                                                                                                                                                                                                                                                                                                                                                                                         |
|---------------------------------------------------------------------------------------------------------------------------------------------------------------------------------------------------------------------------------------------------------------------------------------------------------------------------------------------------------------------------------------------------------------------------------------------------------------------------------------------------------------------------------------------------------------------------------------------------------------------------------------------------------------------------------------------------------------------------------------------------------------------------------------------------------------|
| <ul style="list-style-type: none"><li>• Is there anything else you can think of that would improve your experience of being a NorEx participant?</li><li>• <b>Summary</b> (<i>summarize what we have talked about based on the main points</i>)</li><li>• Is there anything that hasn't been mentioned that may be relevant to what we've talked about now - or that is important for your exercise going forward? / Is there anything else you can think of that may be important that we haven't talked about?</li><li>• Can I contact you to clarify or confirm if there is any uncertainty regarding your answers during this interview?</li><li>• Is there anything you would like to ask me before we conclude the interview?</li></ul> <p>Thank you very much for participating in this interview.</p> |
